Development 136, 2133 (2009) doi:10.1242/dev.039172

## Stem cells, signals and vertebrate body axis extension

Valerie Wilson, Isabel Olivera-Martinez and Kate G. Storey

There was an error published in *Development* **136**, 1591-1604.

Table 1 should also have cited Dunty et al., 2008 in the Wnt signalling section describing  $\beta$ -catenin<sup>ff</sup>; *T-Cre* mice.

**Dunty, W. C., Jr, Biris, K. K., Chalamalasetty, R. B., Taketo, M. M., Lewandoski, M. and Yamaguchi, T. P.** (2008). Wnt3a/beta-catenin signaling controls posterior body development by coordinating mesoderm formation and segmentation. *Development* **135**, 85-94.

The authors apologise to readers for this mistake.
